# Supplementary material for: Clinical Characteristics and Predictors of All-Cause Mortality in Patients with Hypertensive Urgency at an Emergency Department
Source: MDPI journal article supplement (doi:10.3390/jcm10194314), 2021-09-22
Supplement: s1 [file s1]

**Supplementary Table 1.** Predictors for 1-year all-cause mortality

| Variables                          | Univariate        |                 | Multivariate         |                 |
|------------------------------------|-------------------|-----------------|----------------------|-----------------|
|                                    | HR (95% CI)       | <i>p</i> -value | Adjusted HR (95% CI) | <i>p</i> -value |
| Age (vs. < 40 years)               |                   |                 |                      |                 |
| 40 to 59 years                     | 2.11 (1.93–2.32)  | < 0.001         | 3.16 (0.73–13.77)    | 0.125           |
| ≥ 60 years                         | 8.18 (5.77–11.58) | < 0.001         | 18.89 (4.66–76.49)   | < 0.001         |
| Male sex                           | 1.22 (0.97–1.53)  | 0.087           | 1.44 (1.07–1.95)     | 0.017           |
| SBP (per 1 mmHg)                   | 1.01 (1.01–1.02)  | < 0.001         |                      |                 |
| History of hypertension            | 1.89 (1.49–2.39)  | < 0.001         |                      |                 |
| History of diabetes mellitus       | 2.08 (1.64–2.63)  | < 0.001         |                      |                 |
| History of ischemic stroke         | 2.96 (2.17–4.05)  | < 0.001         |                      |                 |
| History of hemorrhagic stroke      | 2.01 (1.15–3.51)  | 0.014           |                      |                 |
| History of coronary artery disease | 1.52 (1.03–2.24)  | 0.037           |                      |                 |
| History of chronic kidney disease  | 3.11 (2.27–4.25)  | < 0.001         |                      |                 |
| Creatinine (per 1 mg/dL)           | 1.10 (1.04–1.16)  | 0.002           |                      |                 |

|                                   |                  |         |                  |         |
|-----------------------------------|------------------|---------|------------------|---------|
| Proteinuria                       | 2.83 (2.11–3.81) | < 0.001 | 1.89 (1.38–2.59) | < 0.001 |
| Cardiomegaly on chest radiography | 2.05 (1.54–2.73) | < 0.001 |                  |         |
| LVH on ECG                        | 1.29 (0.89–1.88) | 0.178   |                  |         |

---

HR, hazard ratio; CI, confidence interval; SBP, systolic blood pressure; LVH, left ventricular hypertrophy; ECG, electrocardiography.
